# Supplementary material for: Peptides containing the PCNA interacting motif APIM bind to the β-clamp and inhibit bacterial growth and mutagenesis
Source: Nucleic Acids Res. 2020 Apr 29;48(10):5540–54. doi: 10.1093/nar/gkaa278 (PMC7261172; doi:10.1093/nar/gkaa278)
Supplement: gkaa278_Supplemental_File [file gkaa278_supplemental_file.pdf]

## Supplementary data

### Peptides containing the PCNA interacting motif APIM bind to the $\beta$ -clamp and inhibit bacterial growth and mutagenesis

Aina Nedal<sup>1, #</sup>, Synnøve Brandt Ræder<sup>1, #</sup>, Bjørn Dalhus<sup>2,3</sup>, Emily Helgesen<sup>1,3</sup>, Rune Johansen Forstrøm<sup>3</sup>, Kim Lindland<sup>1</sup>, Balagra Kasim Sumabe<sup>1</sup>, Jacob H. Martinsen<sup>4</sup>, Birthe B. Kragelund<sup>4</sup>, Kirsten Skarstad<sup>3</sup>, Magnar Bjørås<sup>1,3</sup> and Marit Otterlei<sup>1\*</sup>

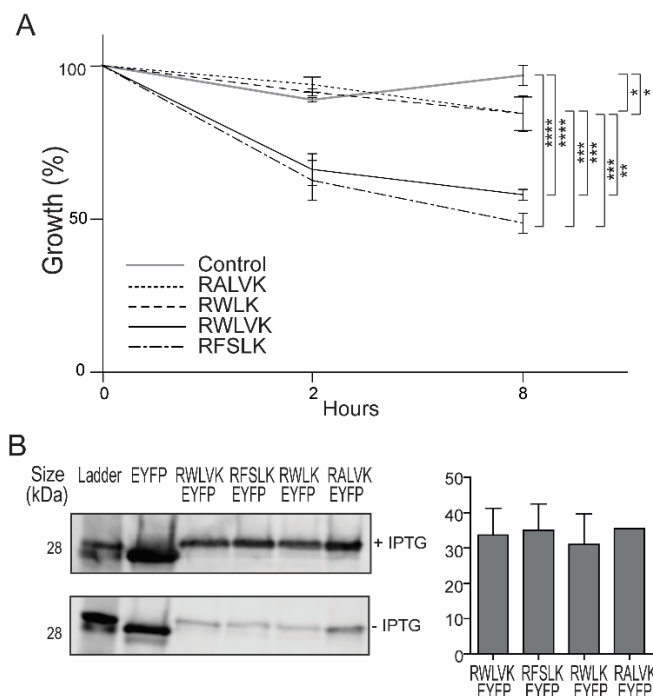

### Supplementary Figure S1: Additional growth measurements (OD<sub>600</sub>) of BL21 expressing different APIM variants and the quantification of the expression of the peptides.

**(A)** Effect of overexpressing different APIM-peptides (RWLVK, RFSLK, RWLK and RALVK) on BL21 growth. Control= BL21 without vector. Experiments are performed as described in Figure 1D. Data presented represent average data from 3 technical replicas from 4 biological experiments (3 different bacteria clones for each peptide variant)  $p < 0.0001$ \*\*\*\*,  $p < 0.001$ \*\*\*,  $p < 0.01$ \*\*,  $p < 0.05$ \*, two-way ANOVA. **(B)** The expression level of different APIM-variants (RWLVK, RFSLK, RWLK and RALVK) four hours after induction with IPTG. WB showing cell extracts from cultures with and without IPTG induction (upper and lower panel respectively). APIM-peptides are expressed as a fusion peptide with EYFP expressed from pET-28a(+) vector. A vector expressing only EYFP is used as a control. Quantification (right panel) is based on EYFP expression ( $\alpha$ GFP antibody ab290, Abcam), normalized against control. Average of measurements from three membranes are shown (except RALVK-EYFP where only two membranes are included).

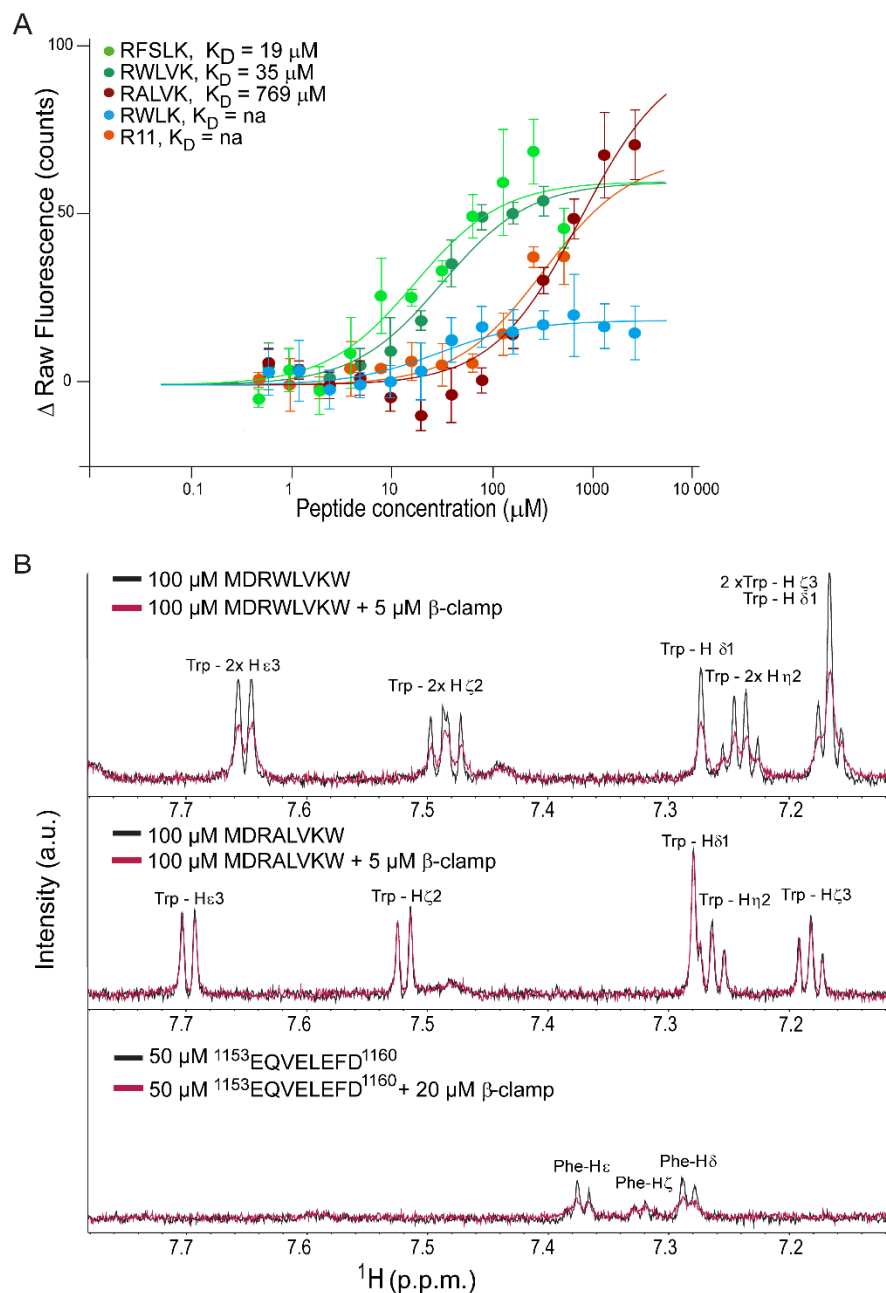

**Supplementary Figure S2: Binding measurement indicate a direct interaction between APIM and the  $\beta$ -clamp.**

(A) Microscale thermophoresis measurements ( $\Delta$ Raw fluorescence) and dissociation constants for interaction between the *E. coli*  $\beta$ -clamp and full-length cell-penetrating APIM-peptides (Ac-MD-“APIM”-W-KKKRK-I-R11), where “APIM” is: **RWLVK**,  $K_D=35 \mu\text{M}$ , **RFSLK**  $K_D=19 \mu\text{M}$  and **RALVK**  $K_D=769 \mu\text{M}$ .  $K_D$ s for **RWLK** (truncated APIM) and R11 were not applicable. Curves are based on 3 independent experiments ( $n=3$ , mean  $\pm$  STD). (B) 1D  $^1\text{H}$  NMR spectra (aromatic region) of the RWLVK (top) alone (black, 100  $\mu\text{M}$ ) and with  $\beta$ -clamp (red, 1  $\mu\text{M}$ ), the RALVK alone (black, 100  $\mu\text{M}$ ) and with  $\beta$ -clamp (red, 1  $\mu\text{M}$ ) and Pol III binding peptide ( $^{1153}\text{EQVELEFD}^{1160}$ ) (bottom) alone (black, 50  $\mu\text{M}$ ) and with  $\beta$ -clamp (red, 20  $\mu\text{M}$ ). The NMR spectra were recorded at 298 K with  $nt=32$  and the assignment of peaks are indicated.

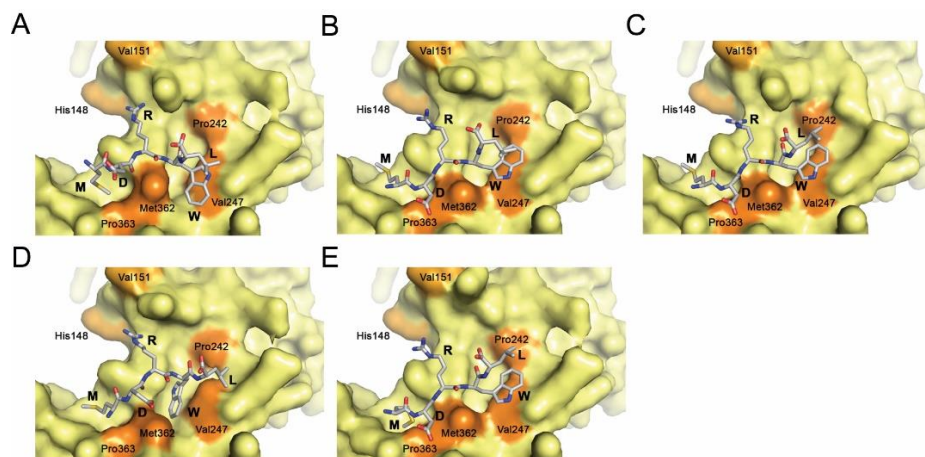

**Supplementary Figure S3. Top 5 docking models from Rosetta FlexPepDock using the crystal structure of Pol V peptide binding to  $\beta$ -clamp as input, with residues QLNLF replaced by MDRWL.**

In model (A-C) and (E) the W-residue of APIM is interacting with the V247 residue in  $\beta$ -clamp, while in one model (D), the W-residue is wedged in-between V247 and M362.

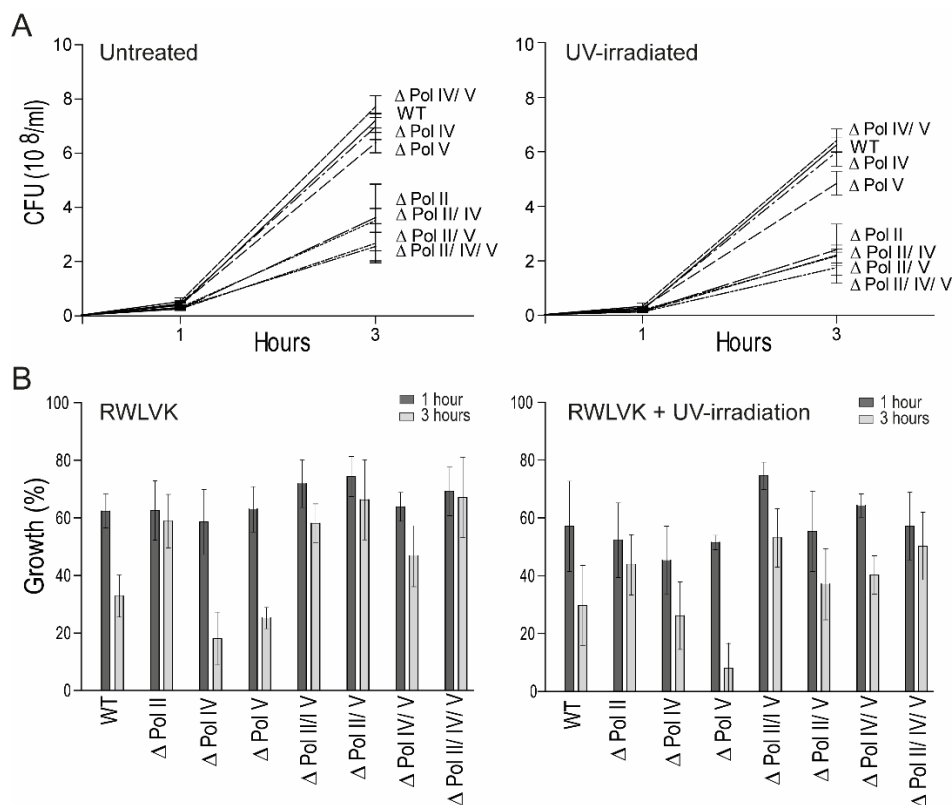

**Supplementary Figure S4: Growth and sensitivity of the single, double, and triple TLS polymerase deletion strains.**

(A) Growth (CFU) of *E. coli* MG1655 WT and single, double and triple TLS polymerase deletion ( $\Delta$ Pol II,  $\Delta$ Pol IV,  $\Delta$ Pol V,  $\Delta$ Pol II/IV,  $\Delta$ Pol II/V,  $\Delta$ Pol IV/V and  $\Delta$ Pol II/IV/V) cultured under normal conditions (untreated,

left panel) and after UV-irradiation (right panel). **(B)** Growth of WT and the deletion mutants relative to untreated cultures (%) 1 and 3 hours after the addition of the cell-penetrating APIM-peptide, RWLVK (20  $\mu$ M). Left: cultured under normal conditions, right: UV-irradiated cultures. Mean  $\pm$  SEM, n=5 independent biological experiments.
